# Supplementary material for: Predictors of non-cystic fibrosis bronchiectasis in Indigenous adult residents of central Australia: results of a case–control study
Source: PubMed Central journal article supplement — ERJ Open Res. 2019 Dec 2;5(4):00001-2019. doi: 10.1183/23120541.00001-2019 (PMC6939737; doi:10.1183/23120541.00001-2019), 2019-12-02
Supplement: 00001-2019.supp.pdf [file 00001-2019.supp.pdf]

**Table S1. Results of investigations for cases and their controls<sup>a</sup>**

| Pathology test                                     | Cases<br>(n=80) | Controls<br>(n=160) | P Value |
|----------------------------------------------------|-----------------|---------------------|---------|
| Strongyloides <sup>b</sup> No. (%)                 | 31 (38.8)       | 32 (20.0)           | 0.001   |
| Eosinophilia <sup>c</sup>                          | 21 (26.3)       | 46 (28.8)           | 0.684   |
| <i>Sputum cultures</i> <sup>d</sup> , Median (IQR) | 1 (0, 4)        | 0 (0, 2)            | <0.001  |
| Yield <sup>e</sup> - mean (SD)                     | 0.45 (0.49)     | 0.26 (0.47)         | <0.001  |
| <i>Streptococcus pneumoniae</i> – mean (SD)        | 0.54 (1.31)     | 0.20 (0.54)         | 0.041   |
| <i>Haemophilus influenzae</i> – mean (SD)          | 1.81 (3.59)     | 0.44 (1.01)         | <0.001  |
| <i>Mycobacterial cultures</i> <sup>f</sup> (N, %)  | 15 (18.8)       | 8 (5.0)             | 0.001   |
| NTM <sup>g</sup>                                   | 6 (7.5)         | 1 (0.6)             | 0.003   |
| TB                                                 | 2 (2.5)         | 2 (1.3)             | 0.476   |
| <i>Blood cultures</i> , Mean (SD)                  |                 |                     |         |
| All BSI                                            | 0.54 (1.04)     | 0.30 (0.98)         | 0.022   |
| <i>Streptococcus pneumoniae</i>                    | 0.21 (0.65)     | 0.06 (0.33)         | 0.020   |
| <i>Haemophilus influenzae</i>                      | 0.05 (0.22)     | 0.02 (0.18)         | 0.083   |
| <i>Echocardiograph</i> <sup>h</sup> (N, %)         | N=55            | N=71                |         |
| Dilated RV                                         | 18 (32.7)       | 4 (5.6)             | <0.001  |
| Tricuspid Regurgitation                            | 16 (29.1)       | 7 (9.9)             | 0.006   |
| Pulmonary Hypertension                             | 23 (41.8)       | 9 (12.7)            | <0.001  |

**Legend S1.**

- a. With the exception of echocardiography, all data are from date of first admission to date of diagnosis for cases and to date of recruitment for controls.
- b. Strongyloides seropositive or in stool at any time. Cases: Strongyloides seropositive, 30; larvae in stool, 3. Controls: Strongyloides seropositive, 30; larvae in stool, 7.
- c. Peripheral blood eosinophilia recorded at least twice over a twelve month period.
- d. Data for cases are from date of first admission to date of diagnosis.
- e. The number of pathogens isolated divided by the number of sputum cultures taken
- f. More than 3 adequate Mycobacterial cultures taken prior to diagnosis
- g. Non-tuberculous mycobacteria were isolated from six cases prior to diagnosis including a novel species that could not be identified together with a scotochromogenic mycobacterium, *Mycobacterium avium* complex in a patient with pulmonary TB and *Mycobacterium simiae* (isolated once from one subject and twice from another). Mycobacteria were not identified to species level in two cases from which an NTM was isolated only once.
- h. Echocardiography available for 126 patients (55 cases, 71 controls). Percentages expressed as proportions of each group reporting echocardiography results

Abbreviations: BSI, blood stream infection; NTM, non-tuberculous mycobacteria; RV, right ventricle; TB, tuberculosis.

**Table S2.****Results of bronchiectasis-related investigations according to HTLV-1 status**

|                                           | HTLV-1<br>Pos (n=42) | HTLV-1<br>Neg (n=38) | P value |
|-------------------------------------------|----------------------|----------------------|---------|
| <i>Chest HRCT</i>                         | 41 (97.6)            | 37 (97.4)            |         |
| <b>Radiological Abnormality Scores</b>    |                      |                      |         |
| Total all lobes score, Mean (SD)          | 16.8 (9.3)           | 16.3 (10.5)          | 0.652   |
| Total BE score, Mean (SD)                 | 5.5 (4.1)            | 5.5 (4.3)            | 0.992   |
| Total wall thickening, Mean (SD)          | 4.5 (3.2)            | 3.7 (2.7)            | 0.288   |
| Total Cystic score, Mean (SD)             | 1.2 (1.5)            | 1.1 (1.3)            | 0.983   |
| Total GG, Mean (SD)                       | 1.2 (1.4)            | 1.3 (1.6)            | 0.996   |
| Total Emphysema score, Mean (SD)          | 2.8 (2.3)            | 3.2 (2.2)            | 0.542   |
| Bilateral disease, N (%)                  | 22 (52.4)            | 22 (57.9)            | 0.606   |
| <i>Echocardiography<sup>a</sup></i> N (%) | 28 (66.7)            | 27 (71.1)            |         |
| Dilated Right ventricle                   | 10 (35.7)            | 8 (29.6)             | 0.631   |
| Tricuspid Regurgitation                   | 7 (25.0)             | 9 (33.3)             | 0.496   |
| Pulmonary Hypertension                    | 11 (39.3)            | 12 (44.4)            | 0.698   |
| <i>Spirometry<sup>b</sup></i>             | 21 (50)              | 17 (44.7)            |         |
| FEV1 – Mean (SD)                          | 1.1 (0.5)            | 1.1 (0.5)            | 0.942   |
| FEV1 % predicted – Mean (SD)              | 38.4 (19.4)          | 33.2 (13.4)          | 0.3443  |
| FEV1<1L – n (%)                           | 9 (42.9)             | 9 (52.9)             | 0.536   |
| FVC – Mean (SD)                           | 1.8 (0.6)            | 1.7 (0.5)            | 0.837   |

|                                           |             |             |        |
|-------------------------------------------|-------------|-------------|--------|
| FVC % predicted                           | 47.9 (15.9) | 43.1 (11.5) | 0.3100 |
| FEV1/FVC – Mean (SD)                      | 64.5 (15.7) | 64.3 (16.8) | 0.953  |
| Sputum Yield – Mean (SD)                  | 0.5 (0.6)   | 0.6 (0.4)   | 0.110  |
| Strongyloides seropositive at recruitment | 7 (18.4)    | 6 (14.6)    | 0.083  |
| Immunology                                |             |             |        |
| ANA positive <sup>c</sup> No. (%)         | 4 (9.8)     | 2 (5.6)     | 0.679  |
| ENA positive <sup>d</sup> No. (%)         | 1 (2.4)     | 0 (0.0)     | 1.000  |
| RF > 12 (IU/ml) No. (%)                   | 9 (21.4)    | 6 (15.8)    | 0.370  |
| Immunoglobulins (IU/ml) mean (SD)         |             |             |        |
| IgA                                       | 4.8 (1.5)   | 5.3 (2.4)   | 0.414  |
| IgM                                       | 1.7 (3.1)   | 1.3 (1.0)   | 0.697  |
| Total IgG                                 | 21.3 (6.4)  | 20.3 (6.5)  | 0.675  |
| IgG1                                      | 14.8 (4.2)  | 13.7 (5.0)  | 0.365  |
| IgG2                                      | 5.3 (2.3)   | 5.6 (2.9)   | 0.912  |
| IgG3                                      | 1.2 (0.4)   | 1.2 (0.6)   | 0.903  |
| IgG4                                      | 0.5 (0.5)   | 0.6 (0.6)   | 0.219  |
| Increased IgE, No. (%)                    | 26 (61.9)   | 26 (68.4)   | 0.348  |
| Aspergillus Precipitins positive          | 3 (7.1)     | 1 (2.6)     | 0.383  |
| Alpha1AT deficiency                       | 0           | 0           |        |

## Table S2 Legend

a. Echocardiography available for n=55 cases (28 HTLV-1 positive, 27 negative). Percentages expressed as proportions of each group reporting echocardiography results

b. Spirometry available for n=38 cases (21 HTLV-1 positive, 17 negative). Percentages expressed as proportions of each group reporting spirometry results

c. ANA available for n=77 cases (41 HTLV-1 positive, 36 negative). Percentages expressed as proportions of each group reporting ANA results

d. ENA available for n=75 cases (41 HTLV-1 positive, 34 negative). Percentages expressed as proportions of each group reporting ENA results

Abbreviations: ANA, anti-nuclear antibodies; BE, bronchiectasis; ENA, extractable nuclear antigens; FEV1, forced expiratory volume 1 second; FVC, forced vital capacity; GG, ground glass opacity; HRCT, high resolution computed tomography; Ig, immunoglobulin; RF, rheumatoid factor.
